# Supplementary figures and images for: Sonochemical effects on the structure and antioxidant activity of egg white protein–tea polyphenol conjugates
Source: Royal Society of Chemistry journal article supplement (doi:10.1039/d0fo01636e), 2020-01-01

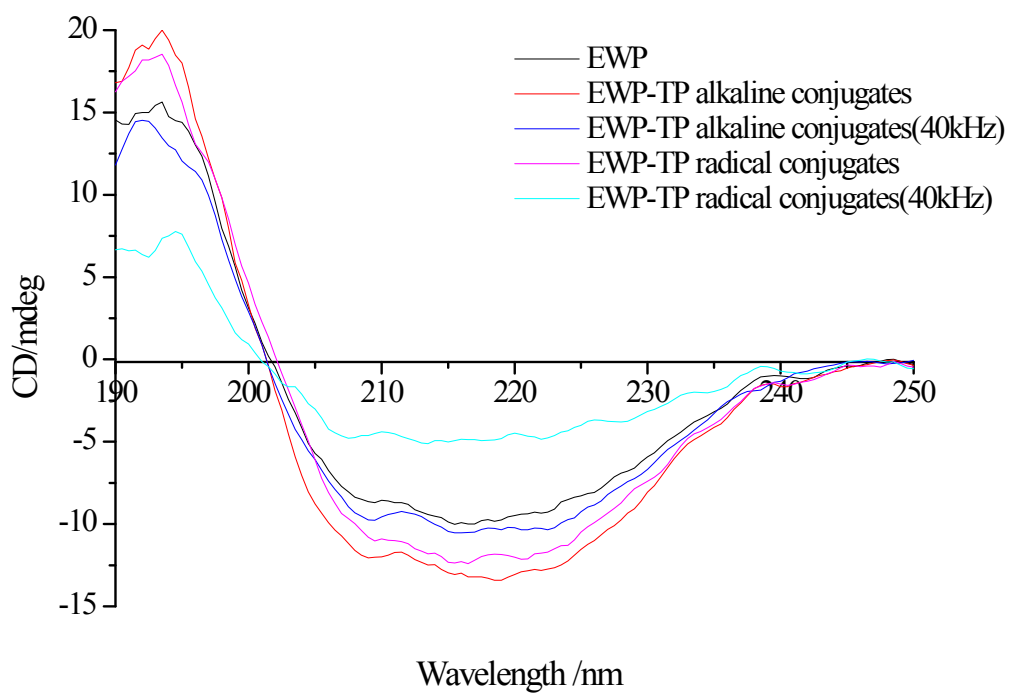

Figure 1 CD spectra of EWP and EWP-TP conjugates

Supplement: d0fo01636e1.pdf [file d0fo01636e1.pdf]
